# Supplementary material for: Comprehensive uncertainty estimation of the timing of Greenland warmings in the Greenland ice core records
Source: Copernicus journal article supplement (doi:10.5194/cp-18-1275-2022), 2022-06-20
Supplement: Supplementary file 1 [file cp-18-1275-2022-supplement.zip]

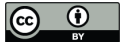

*Supplement of*

## **Comprehensive uncertainty estimation of the timing of Greenland warmings in the Greenland ice core records**

**Eirik Myrvoll-Nilsen et al.**

*Correspondence to:* Eirik Myrvoll-Nilsen ([myrvoll@pik-potsdam.de](mailto:myrvoll@pik-potsdam.de)) and Niklas Boers ([n.boers@tum.de](mailto:n.boers@tum.de))

- [cp-18-1275-2022-supplement-title-page.pdf](#)
- [ageresults.txt](#)
- [depthresults.txt](#)
- [event\\_intervals.txt](#)

The copyright of individual parts of the supplement might differ from the article licence.
